# Supplementary material for: Identifying the snake: First scoping review on practices of communities and healthcare providers confronted with snakebite across the world
Source: PLoS One. 2020 Mar 5;15(3):e0229989. doi: 10.1371/journal.pone.0229989 (PMC7058330; doi:10.1371/journal.pone.0229989)
Supplement: S3 Table — (XLSX) [file pone.0229989.s003.xlsx]

## Sheet: Taxonomy
region	country	source_name	species	diff	diff.reason	family	genus	taxlevel	mivs-who	mivs	no.spp.in.genus	no.spp.in.country	diurnal	active.foraging	ref_no	first_author	year	abundance		notes
Africa	Zimbabwe	Causus defilippi	Causus defilippi	n		Viperidae	Causus	species	n	maybe					1	Blaylock	1982	8		bites from Causus spp. are somewhat common but unlikely to cause serious ill effects (Warrell et al. 1976; Marais 1981)
Africa	South Africa	night adder	Causus rhombeatus	y	common vs scientific name	Viperidae	Causus	species	n	maybe					1	Coetzer	1982	3		bites from Causus spp. are somewhat common but unlikely to cause serious ill effects (Warrell et al. 1976; Marais 1981)
Africa	South Africa	Causus rhombeatus	Causus rhombeatus	n		Viperidae	Causus	species	n	maybe					2	McNally	1987	2		bites from Causus spp. are somewhat common but unlikely to cause serious ill effects (Warrell et al. 1976; Marais 1981)
Africa	South Africa	Causus rhombeatus	Causus rhombeatus	n		Viperidae	Causus	species	n	maybe					3	Blaylock	2004	4		bites from Causus spp. are somewhat common but unlikely to cause serious ill effects (Warrell et al. 1976; Marais 1981)
Africa	Zimbabwe	Typhlops schlegelii	Afrotyphlops schlegelii	y	genus change	Typhlopidae	Afrotyphlops	species	n	n					1	Blaylock	1982	1
Africa	South Africa	brown house snake	Boaedon capensis	y	common vs scientific name	Lamprophiidae	Boaedon	species	n	n					1	Coetzer	1982	1
Africa	Zimbabwe	Boaedon fuliginosus	Boaedon capensis	y	split	Colubridae	Boaedon	species	n	n					1	Blaylock	1982	1
Africa	South Africa	Crotaphopeltis hotamboeia	Crotaphopeltis hotamboeia	n		Colubridae	Crotaphopeltis	species	n	n					3	Blaylock	2004	1
Africa	Zimbabwe	Crotaphopeltis hotamboeia	Crotaphopeltis hotamboeia	n		Colubridae	Crotaphopeltis	species	n	n					1	Blaylock	1982	2
Africa	South Africa	Dasypeltis scabra	Dasypeltis scabra	n		Colubridae	Dasypeltis	species	n	n					2	McNally	1987	1
Africa	South Africa	Philothamnus spp.	Philothamnus spp.	n		Colubridae	Philothamnus	genus	n	n					3	Blaylock	2004	2
Africa	South Africa	burrowing viper	Atractaspis bibronii	y	common vs scientific name	Lamprophiidae	Atractaspis	species	y	y					1	Coetzer	1982	7
Africa	South Africa	Atractaspis bibronii	Atractaspis bibronii	n		Lamprophiidae	Atractaspis	species	y	y					3	Blaylock	2004	2
Africa	South Africa	Atractaspis bibronii	Atractaspis bibronii	n		Lamprophiidae	Atractaspis	species	y	y					2	McNally	1987	8
Africa	Zimbabwe	Atractaspis bibronii	Atractaspis bibronii	n		Lamprophiidae	Atractaspis	species	y	y					1	Blaylock	1982	5
Africa	South Africa	puff adder	Bitis arietans	y	common vs scientific name	Viperidae	Bitis	species	y	y					1	Coetzer	1982	2
Africa	South Africa	Bitis arietans	Bitis arietans	n		Viperidae	Bitis	species	y	y					2	McNally	1987	1
Africa	South Africa	Bitis arietans	Bitis arietans	n		Viperidae	Bitis	species	y	y					3	Blaylock	2004	5
Africa	South Africa	Bitis atropos	Bitis atropos	n		Viperidae	Bitis	species	y	y					2	McNally	1987	1
Africa	Morocco	Daboia mauritanica	Daboia mauritanica	n		Viperidae	Daboia	species	y	y					1	Elayoubi	2015	3
Africa	South Africa	black mamba	Dendroaspis polylepis	y	common vs scientific name	Elapidae	Dendroaspis	species	y	y					1	Coetzer	1982	2
Africa	South Africa	Dendroaspis polylepis	Dendroaspis polylepis	n		Elapidae	Dendroaspis	species	y	y					3	Blaylock	2004	1
Africa	South Africa	Dendroaspis polylepis	Dendroaspis polylepis	n		Elapidae	Dendroaspis	species	y	y					2	McNally	1987	8
Africa	Zimbabwe	Dendroaspis polylepis	Dendroaspis polylepis	n		Elapidae	Dendroaspis	species	y	y					1	Blaylock	1982	1
Africa	Cameroon	Echis ocellatus	Echis romani	y	split	Elapidae	Echis	species	y	y					3	Chippaux	1999	19		Trape (2018) divided Echis ocellatus into 3 species; Echis romani occurs in Cameroon
Africa	Cameroon	Echis ocellatus	Echis romani	y	split	Elapidae	Echis	species	y	y					2	Einterz	2003	40		Trape (2018) divided Echis ocellatus into 3 species; Echis romani occurs in Cameroon
Africa	Nigeria	Echis carinatus ocellatus	Echis romani	y	split	Viperidae	Echis	species	y	y					2	Pugh	1987	8		Trape (2018) divided Echis ocellatus into 3 species; Echis romani occurs in central & eastern Nigeria, E. ocellatus in western Nigeria
Africa	Nigeria	Echis carinatus	Echis romani	y	split	Viperidae	Echis	species	y	y					1	Michael	2011	36	36 NR	Trape (2018) divided Echis ocellatus into 3 species; Echis romani occurs in central & eastern Nigeria, E. ocellatus in western Nigeria
Africa	South Africa	Hemachatus haemachatus	Hemachatus haemachatus	n		Elapidae	Hemachatus	species	y	y					2	McNally	1987	1
Africa	South Africa	Naja haje annulifera	Naja annulifera	y	subspecies elevated	Elapidae	Naja	species	y	y					2	McNally	1987	3
Africa	Cameroon	Naja melanoleuca	Naja melanoleuca	n		Elapidae	Naja	species	y	y					1	Tiyani	2018	1		Wüster et al. 2018 elevated Naja melanoleuca subfulva to species status in dry northern regions of Cameroon
Africa	South Africa	spitting cobra	Naja mossambica	y	common vs scientific name	Elapidae	Naja	species	y	y					1	Coetzer	1982	7
Africa	South Africa	Naja mossambica	Naja mossambica	n		Elapidae	Naja	species	y	y					3	Blaylock	2004	7
Africa	Zimbabwe	Naja mossambica	Naja mossambica	n		Elapidae	Naja	species	y	y					1	Blaylock	1982	4
Asia	Thailand	Acrochordus javanicus	Acrochordus javanicus	n		Acrochordidae	Acrochordus	species	n	n					4	Viravan	1992	NR		count not given, all non-venomous together sum to 491
Asia	Sri Lanka	Ahaetulla nasuta	Ahaetulla nasuta	n		Colubridae	Ahaetulla	species	n	n					9	Ariaratnam	2009	10		occasional slight symptoms (Weinstein et al. 2011)
Asia	Thailand	Ahaetulla prasina	Ahaetulla prasina	n		Colubridae	Ahaetulla	species	n	n					4	Viravan	1992	NR		count not given, all non-venomous together sum to 491
Asia	India	Argyrogena fasciolata	Argyrogena fasciolata	n		Colubridae	Argyrogena	species	n	n					10	Joseph	2017	1
Asia	Sri Lanka	Atreitum schistosum	Atreitum schistosum	n		Colubridae	Atreitum	species	n	n					9	Ariaratnam	2009	1
Asia	Sri Lanka	Boiga ceylonensis	Boiga ceylonensis	n		Colubridae	Boiga	species	n	n					9	Ariaratnam	2009	2		limited information suggests mild local effects (Weinstein et al. 2011)
Asia	Sri Lanka	Boiga ceylonensis	Boiga ceylonensis	n		Colubridae	Boiga	species	n	n					14	Kularatne	2011b	8		limited information suggests mild local effects from bites of some species of Boiga (Weinstein et al. 2011)
Asia	Thailand	Boiga cyanea	Boiga cyanea	n		Colubridae	Boiga	species	n	n					4	Viravan	1992	NR		count not given, all non-venomous together sum to 491; limited information suggests mild local effects from bites of some species of Boiga (Weinstein et al. 2011)
Asia	Thailand	Boiga cynodon	Boiga cynodon	n		Colubridae	Boiga	species	n	n					4	Viravan	1992	NR		count not given, all non-venomous together sum to 491; limited information suggests mild local effects from bites of some species of Boiga (Weinstein et al. 2011)
Asia	Sri Lanka	Boiga forstenii	Boiga forstenii	n		Colubridae	Boiga	species	n	n					9	Ariaratnam	2009	8		limited information suggests mild local effects (Weinstein et al. 2011)
Asia	Thailand	Boiga multomaculata	Boiga multomaculata	n		Colubridae	Boiga	species	n	n					4	Viravan	1992	NR		count not given, all non-venomous together sum to 491; limited information suggests mild local effects from bites of some species of Boiga (Weinstein et al. 2011)
Asia	Sri Lanka	cat snake	Boiga sp.	y	common vs scientific name	Colubridae	Boiga	genus	n	n					11	Shahmy	2017	4
Asia	Sri Lanka	Boiga trigonata	Boiga trigonata	n		Colubridae	Boiga	species	n	n					9	Ariaratnam	2009	4
Asia	Sri Lanka	Chrysopelea ornata	Chrysopelea ornata	n		Colubridae	Chrysopelea	species	n	n					9	Ariaratnam	2009	1		bites with symptoms have been described from other species of Chrysopelea
Asia	Thailand	Chrysopelea ornata	Chrysopelea ornata	n		Colubridae	Chrysopelea	species	n	n					4	Viravan	1992	NR		count not given, all non-venomous together sum to 491; limited information suggests mild local effects from bites of some species of Boiga (Weinstein et al. 2011)
Asia	Malaysia	Chrysopelea pelias	Chrysopelea pelias	n		Colubridae	Chrysopelea	species	n	n					1	Ismail	2010	1
Asia	India	Coelognathus helena	Coelognathus helena	n		Colubridae	Coelognathus	species	n	n					10	Joseph	2017	2
Asia	Nepal	Coelognathus helena	Coelognathus helena	n		Colubridae	Coelognathus	species	n	n					3	Sharma	2016	2
Asia	Sri Lanka	Elaphe helena	Coelognathus helena	y	genus change	Colubridae	Coelognathus	species	n	n					9	Ariaratnam	2009	1
Asia	Bangladesh	Coelognathus radiatus	Coelognathus radiatus	n		Colubridae	Coelognathus	species	n	n					1	Harris	2010	4
Asia	Thailand	Elaphe radiata	Coelognathus radiatus	y	genus change	Colubridae	Coelognathus	species	n	n					4	Viravan	1992	NR		count not given, all non-venomous together sum to 491
Asia	Sri Lanka	Cylindrophis maculatus	Cylindrophis maculatus	n		Cylindrophiidae	Cylindrophis	species	n	n					9	Ariaratnam	2009	1
Asia	Thailand	Cylindrophis ruffus	Cylindrophis ruffus	n		Cylindrophiidae	Cylindrophis	species	n	n					4	Viravan	1992	NR		count not given, all non-venomous together sum to 491
Asia	Thailand	Enhydris enhydris	Enhydris enhydris	n		Homalopsidae	Enhydris	species	n	n					4	Viravan	1992	NR		count not given, all non-venomous together sum to 491
Asia	Thailand	Enhydris jagorii	Enhydris jagorii	n		Homalopsidae	Enhydris	species	n	n					4	Viravan	1992	NR		count not given, all non-venomous together sum to 491
Asia	Thailand	Gonyosoma oxycephalum	Gonyosoma oxycephalum	n		Colubridae	Gonyosoma	species	n	n					4	Viravan	1992	NR		count not given, all non-venomous together sum to 491
Asia	Thailand	Homolopsis buccata	Homolopsis buccata	n		Homalopsidae	Homolopsis	species	n	n					4	Viravan	1992	NR		count not given, all non-venomous together sum to 491
Asia	Thailand	Enhydris plumbea	Hypsiscopus plumbea	y	genus change	Homalopsidae	Hypsiscopus	species	n	n					4	Viravan	1992	NR		count not given, all non-venomous together sum to 491
Asia	Thailand	Ramphotyphlops braminus	Indotyphlops braminus	y	genus change	Typhlopidae	Indotyphlops	species	n	n					4	Viravan	1992	NR		count not given, all non-venomous together sum to 491
Asia	Bangladesh	Lycodon aulicus	Lycodon aulicus	n		Colubridae	Lycodon	species	n	n					1	Harris	2010	13
Asia	India	Lycodon aulicus	Lycodon aulicus	n		Colubridae	Lycodon	species	n	n					10	Joseph	2017	2
Asia	Nepal	Lycodon aulicus	Lycodon aulicus	n		Colubridae	Lycodon	species	n	n					3	Sharma	2016	9
Asia	Sri Lanka	Lycodon aulicus	Lycodon aulicus	n		Colubridae	Lycodon	species	n	n					9	Ariaratnam	2009	33
Asia	Thailand	Lycodon aulicus capucinus	Lycodon capucinus	y	subspecies elevated	Colubridae	Lycodon	species	n	n					4	Viravan	1992	NR		count not given, all non-venomous together sum to 491
Asia	Thailand	Dryocalamus davisonii	Lycodon davisonii	y	genus change	Colubridae	Lycodon	species	n	n					4	Viravan	1992	NR		count not given, all non-venomous together sum to 491
Asia	Thailand	Lycodon laoensis	Lycodon laoensis	n		Colubridae	Lycodon	species	n	n					4	Viravan	1992	NR		count not given, all non-venomous together sum to 491
Asia	Sri Lanka	wolf snake	Lycodon spp.	y	common vs scientific name	Colubridae	Lycodon	genus	n	n					11	Shahmy	2017	3
Asia	Sri Lanka	Lycodon striatus	Lycodon striatus	n		Colubridae	Lycodon	species	n	n					9	Ariaratnam	2009	15
Asia	Saudi Arabia	Malpolon moilensis	Malpolon moilensis	n		Lamprophiidae	Malpolon	species	n	n					2	Mahaba	2000	4
Asia	Sri Lanka	non-venomous snakes	non-venomous snakes	n		NA	NA	nv	n	n					18	Kularatne	2014	53
Asia	India	Oligodon arnensis	Oligodon arnensis	n		Colubridae	Oligodon	species	n	n					10	Joseph	2017	1
Asia	Sri Lanka	Oligodon arnensis	Oligodon arnensis	n		Colubridae	Oligodon	species	n	n					9	Ariaratnam	2009	6
Asia	Thailand	Oligodon dorsolateralis	Oligodon cyclurus	y	lump	Colubridae	Oligodon	species	n	n					4	Viravan	1992	NR		count not given, all non-venomous together sum to 491
Asia	Thailand	Oligodon cyclurus	Oligodon cyclurus	n		Colubridae	Oligodon	species	n	n					4	Viravan	1992	NR		count not given, all non-venomous together sum to 491
Asia	Laos	Oligodon spp	Oligodon spp	n		Colubridae	Oligodon	genus	n	n						Vongphoumy	2016	7
Asia	Thailand	Oligodon taeniatus	Oligodon taeniatus	n		Colubridae	Oligodon	species	n	n					4	Viravan	1992	NR		count not given, all non-venomous together sum to 491
Asia	India	Oligodon taeniolatus	Oligodon taeniolatus	n		Colubridae	Oligodon	species	n	n					10	Joseph	2017	2
Asia	Thailand	Pareas carinatus	Pareas carinatus	n		Pareidae	Pareas	species	n	n					4	Viravan	1992	NR		count not given, all non-venomous together sum to 491
Asia	Nepal	Psammodynastes pulverulentus	Psammodynastes pulverulentus	n		Lamprophiidae	Psammodynastes	species	n	n					3	Sharma	2016	2
Asia	Thailand	Psammodynastes pulverulentus	Psammodynastes pulverulentus	n		Lamprophiidae	Psammodynastes	species	n	n					4	Viravan	1992	NR		count not given, all non-venomous together sum to 491
Asia	Nepal	Ptyas mucosa	Ptyas mucosa	n		Colubridae	Ptyas	species	n	n					3	Sharma	2016	1
Asia	Sri Lanka	Ptyas mucosus	Ptyas mucosa	y	spelling	Colubridae	Ptyas	species	n	n					14	Kularatne	2011b	1
Asia	Sri Lanka	Ptyas mucosa	Ptyas mucosa	n		Colubridae	Ptyas	species	n	n					9	Ariaratnam	2009	11
Asia	Sri Lanka	rat snake	Ptyas spp.	y	common vs scientific name	Colubridae	Ptyas	genus	n	n					11	Shahmy	2017	2
Asia	Sri Lanka	python	Python molurus	y	common vs scientific name	Pythonidae	Python	species	n	n					11	Shahmy	2017	NR		count not given
Asia	Sri Lanka	Python molurus	Python molurus	n		Pythonidae	Python	species	n	n					9	Ariaratnam	2009	2
Asia	Thailand	Enhydris boucourti	Subsessor bocourti	y	genus change	Homalopsidae	Subsessor	species	n	n					4	Viravan	1992	NR		count not given, all non-venomous together sum to 491
Asia	Sri Lanka	Xenochrophis asperrimus	Xenochrophis asperrimus	n		Colubridae	Xenochrophis	species	n	n					14	Kularatne	2011b	2
Asia	Lao PDR	Xenochrophis flavipunctatus	Xenochrophis flavipunctatus	n		Colubridae	Xenochrophis	species	n	n						Vongphoumy	2016	1
Asia	Thailand	Xenochrophis flavipunctatus	Xenochrophis flavipunctatus	n		Colubridae	Xenochrophis	species	n	n					4	Viravan	1992	NR		count not given, all non-venomous together sum to 491
Asia	Bangladesh	Xenochrophis piscator	Xenochrophis piscator	n		Colubridae	Xenochrophis	species	n	n					1	Harris	2010	1
Asia	India	Xenochrophis piscator	Xenochrophis piscator	n		Colubridae	Xenochrophis	species	n	n					10	Joseph	2017	1
Asia	Nepal	Xenochrophis piscator	Xenochrophis piscator	n		Colubridae	Xenochrophis	species	n	n					3	Sharma	2016	7
Asia	Sri Lanka	Xenochrophis piscator	Xenochrophis piscator	n		Colubridae	Xenochrophis	species	n	n					9	Ariaratnam	2009	3
Asia	Thailand	Xenochrophis piscator	Xenochrophis piscator	n		Colubridae	Xenochrophis	species	n	n					4	Viravan	1992	NR		count not given, all non-venomous together sum to 491
Asia	Sri Lanka	water snake	Xenochrophis spp.	y	common vs scientific name	Colubridae	Xenochrophis	genus	n	n					11	Shahmy	2017	2
Asia	Thailand	Xenopeltis unicolor	Xenopeltis unicolor	n		Xenopeltidae	Xenopeltis	species	n	n					4	Viravan	1992	NR		count not given, all non-venomous together sum to 491
Asia	Saudi Arabia	Bitis arietans	Bitis arietans	n		Viperidae	Bitis	species	y	y					1	Al Durihim	2011	1
Asia	India	Bungarus caeruleus	Bungarus caeruleus	n		Elapidae	Bungarus	species	y	y					8	Kumar	2011	1
Asia	India	Bungarus caeruleus	Bungarus caeruleus	n		Elapidae	Bungarus	species	y	y					4	Bawaskar	2004	2	2
Asia	India	Bungarus caeruleus	Bungarus caeruleus	n		Elapidae	Bungarus	species	y	y					10	Joseph	2017	3
Asia	India	Bungarus caeruleus	Bungarus caeruleus	n		Elapidae	Bungarus	species	y	y					9	Kumar	2018	382
Asia	India	Bungarus caeruleus	Bungarus caeruleus	n		Elapidae	Bungarus	species	y	y					1	Bawaskar	2008	NR	NR
Asia	Nepal	Bungarus caeruleus	Bungarus caeruleus	n		Elapidae	Bungarus	species	y	y					4	Hansdak	1998	1
Asia	Nepal	Bungarus caeruleus	Bungarus caeruleus	n		Elapidae	Bungarus	species	y	y					2	Pandey	2016	6
Asia	Nepal	Bungarus caeruleus	Bungarus caeruleus	n		Elapidae	Bungarus	species	y	y					3	Sharma	2016	10
Asia	Pakistan	common krait	Bungarus caeruleus	y	common vs scientific name	Elapidae	Bungarus	species	y	y						Asif	2016	3
Asia	Sri Lanka	common krait	Bungarus caeruleus	y	common vs scientific name	Elapidae	Bungarus	species	y	y					12	Silva	2013	1
Asia	Sri Lanka	common krait	Bungarus caeruleus	y	common vs scientific name	Elapidae	Bungarus	species	y	y					11	Shahmy	2017	5
Asia	Sri Lanka	Bungarus caeruleus	Bungarus caeruleus	n		Elapidae	Bungarus	species	y	y					18	Kularatne	2014	22
Asia	Sri Lanka	Bungarus caeruleus	Bungarus caeruleus	n		Elapidae	Bungarus	species	y	y					9	Ariaratnam	2009	88
Asia	Sri Lanka	Bungarus caeruleus	Bungarus caeruleus	n		Elapidae	Bungarus	species	y	y					6	Kularatne	2002a	99
Asia	Lao PDR	Bungarus candidus	Bungarus candidus	n		Elapidae	Bungarus	species	y	y						Vongphoumy	2016	4
Asia	Thailand	Bungarus candidus	Bungarus candidus	n		Elapidae	Bungarus	species	y	y					4	Viravan	1992	13
Asia	Bangladesh	Bungarus fasciatus	Bungarus fasciatus	n		Elapidae	Bungarus	species	y	y					1	Harris	2010	1
Asia	Bangladesh	Bungarus fasciatus	Bungarus fasciatus	n		Elapidae	Bungarus	species	y	y					1	Harris	2011	1
Asia	India	Bungarus fasciatus	Bungarus fasciatus	n		Elapidae	Bungarus	species	y	y					9	Kumar	2018	2
Asia	Thailand	Bungarus fasciatus	Bungarus fasciatus	n		Elapidae	Bungarus	species	y	y					4	Viravan	1992	2
Asia	Nepal	Bungarus lividus	Bungarus lividus	n		Elapidae	Bungarus	species	y	y					3	Sharma	2016	3
Asia	Taiwan	Bungarus multicinctus	Bungarus multicinctus	n		Elapidae	Bungarus	species	y	y					1	Mao	2017	6
Asia	Nepal	Bungarus niger	Bungarus niger	n		Elapidae	Bungarus	species	y	y					3	Sharma	2016	1
Asia	India	krait	Bungarus spp.	y	common vs scientific name	Elapidae	Bungarus	genus	y	y						Bawaskar	2002	20
Asia	India	krait	Bungarus spp.	y	common vs scientific name	Elapidae	Bungarus	genus	y	y					5	Logaraj	2013	NR	NR
Asia	Lao PDR	Calloselasma rhodostoma	Calloselasma rhodostoma	n		Viperidae	Calloselasma	species	y	y					1	Blessmann	2010	1
Asia	Lao PDR	Calloselasma rhodostoma	Calloselasma rhodostoma	n		Viperidae	Calloselasma	species	y	y						Vongphoumy	2016	12
Asia	Thailand	Calloselasma rhodostoma	Calloselasma rhodostoma	n		Viperidae	Calloselasma	species	y	y					3	Buranasin	1993	1	1
Asia	Thailand	Calloselasma rhodostoma	Calloselasma rhodostoma	n		Viperidae	Calloselasma	species	y	y					4	Viravan	1992	434
Asia	Saudi Arabia	Cerastes cerastes	Cerastes cerastes	n		Viperidae	Cerastes	species	y	y					1	Al Durihim	2011	7
Asia	Saudi Arabia	Cerastes cerastes gasparetti	Cerastes gasparetti	y	subspecies elevated	Viperidae	Cerastes	species	y	y					2	Mahaba	2000	7		elevated to species status
Asia	Israel	Cerastes vipera	Cerastes vipera	n		Viperidae	Cerastes	species	y	y					1	Lifshitz	2000	1
Asia	India	Russell's viper	Daboia russelii	y	common vs scientific name	Viperidae	Daboia	species	y	y					6	Gopalakrishna	2018	36
Asia	India	Russel viper	Daboia russelii	y	common vs scientific name	Viperidae	Daboia	species	y	y					5	Logaraj	2013	NR	NR
Asia	India	Vipera russelii	Daboia russelii	y	genus change	Viperidae	Daboia	species	y	y					11	Matthai	1981	12		"ln 29 of the children with ARF the snake responsible was identified as a Russell's viper, by examination of the dead snake in 12 and from witnesses' descriptions in 17. In the other 13 children no species identification was possible"
Asia	India	Vipera russelii	Daboia russelii	y	genus change	Viperidae	Daboia	species	y	y					3	Tripathy	2010	1
Asia	India	Vipera russelii	Daboia russelii	y	genus change	Viperidae	Daboia	species	y	y					1	Bawaskar	2008	NR	NR
Asia	India	Daboia russelii	Daboia russelii	n		Viperidae	Daboia	species	y	y					10	Joseph	2017	11
Asia	India	Daboia russelii	Daboia russelii	n		Viperidae	Daboia	species	y	y					9	Kumar	2018	538
Asia	Sri Lanka	Russell's viper	Daboia russelii	y	common vs scientific name	Viperidae	Daboia	species	y	y					11	Shahmy	2017	1
Asia	Sri Lanka	Russell's Viper	Daboia russelii	y	common vs scientific name	Viperidae	Daboia	species	y	y					14	Kularatne	2011b	19
Asia	Sri Lanka	Daboia russelii	Daboia russelii	n		Viperidae	Daboia	species	y	y					16	Rathnayaka	2017b	1
Asia	Sri Lanka	Daboia russelii	Daboia russelii	n		Viperidae	Daboia	species	y	y					18	Kularatne	2014	47
Asia	Sri Lanka	Daboia russelii	Daboia russelii	n		Viperidae	Daboia	species	y	y					9	Ariaratnam	2009	319
Asia	Hong Kong	Vipera russelii	Daboia siamensis	y	genus change & subspecies elevated	Viperidae	Daboia	species	y	y					1	Cockram	1990	1		not found in Hong Kong
Asia	Myanmar	Russell's viper	Daboia siamensis	y	common vs scientific name	Viperidae	Daboia	species	y	y					2	Aye	2018	63
Asia	Myanmar	Daboia russelii siamensis	Daboia siamensis	y	subspecies elevated	Viperidae	Daboia	species	y	y					1	Tun Pe	1991	155
Asia	Thailand	Daboia russelii siamensis	Daboia siamensis	y	subspecies elevated	Viperidae	Daboia	species	y	y					4	Viravan	1992	164
Asia	India	Saw-scaled viper	Echis carinatus	y	common vs scientific name	Viperidae	Echis	species	y	y					6	Gopalakrishna	2018	17
Asia	India	Saw scale viper	Echis carinatus	y	common vs scientific name	Viperidae	Echis	species	y	y					5	Logaraj	2013	NR	NR
Asia	India	Echis sochureki	Echis carinatus	y	lump	Viperidae	Echis	species	y	y					2	Kochar	2007	12		usually considered a subspecies of Echis carinatus, the taxonomy of Echis is in need of revision, particularly in Asia
Asia	India	Echis carinatus	Echis carinatus	n		Viperidae	Echis	species	y	y					10	Joseph	2017	2
Asia	India	Echis carinatus	Echis carinatus	n		Viperidae	Echis	species	y	y					8	Kumar	2011	3
Asia	India	Echis carinatus	Echis carinatus	n		Viperidae	Echis	species	y	y						Bawaskar	2002	8
Asia	India	Echis carinatus	Echis carinatus	n		Viperidae	Echis	species	y	y					9	Kumar	2018	104
Asia	India	Echis carinatus	Echis carinatus	n		Viperidae	Echis	species	y	y					1	Bawaskar	2008	NR	NR
Asia	Pakistan	saw-scaled viper	Echis carinatus	y	common vs scientific name	Viperidae	Echis	species	y	y						Asif	2017	4
Asia	Sri Lanka	saw-scaled viper	Echis carinatus	y	common vs scientific name	Viperidae	Echis	species	y	y					11	Shahmy	2017	3
Asia	Sri Lanka	Echis carinatus	Echis carinatus	n		Viperidae	Echis	species	y	y					9	Ariaratnam	2009	1
Asia	Sri Lanka	Echis carinatus	Echis carinatus	n		Viperidae	Echis	species	y	y					18	Kularatne	2014	1
Asia	Sri Lanka	Echis carinatus	Echis carinatus	n		Viperidae	Echis	species	y	y					10	Kularatne	2011a	26
Asia	Sri Lanka	Echis carinatus	Echis carinatus	n		Viperidae	Echis	species	y	y					8	Gnanathasan	2012	48
Asia	Saudi Arabia	Echis coloratus	Echis coloratus	n		Viperidae	Echis	species	y	y					1	Al Durihim	2011	1
Asia	Saudi Arabia	Echis coloratus	Echis coloratus	n		Viperidae	Echis	species	y	y					2	Mahaba	2000	4
Asia	Thailand	Hydrophis cyanocinctus	Hydrophis cyanocinctus	n		Elapidae	Hydrophis	species	y	y					4	Viravan	1992	2
Asia	Sri Lanka	Pelamis platurus	Hydrophis platurus	y	genus change	Elapidae	Hydrophis	species	y	y					4	Senanayake	2005	1
Asia	Thailand	Pelamis platurus	Hydrophis platurus	y	genus change	Elapidae	Hydrophis	species	y	y					4	Viravan	1992	1
Asia	Sri Lanka	Enhydrina schistosa	Hydrophis schistosus	y	genus change	Elapidae	Hydrophis	species	y	y					4	Senanayake	2005	1
Asia	Thailand	Enhydrina schistosa	Hydrophis schistosus	y	genus change	Elapidae	Hydrophis	species	y	y					4	Viravan	1992	1
Asia	Sri Lanka	Hydrophis spiralis	Hydrophis spiralis	n		Elapidae	Hydrophis	species	y	y					9	Ariaratnam	2009	1
Asia	India	Hypnale hypnale	Hypnale hypnale	n		Viperidae	Hypnale	species	y	y					8	Kumar	2011	3
Asia	India	Hypnale hypnale	Hypnale hypnale	n		Viperidae	Hypnale	species	y	y					10	Joseph	2017	5
Asia	India	Hypnale hypnale	Hypnale hypnale	n		Viperidae	Hypnale	species	y	y					9	Kumar	2018	224
Asia	Sri Lanka	Merrem's Hump-nosed Viper	Hypnale hypnale	y	common vs scientific name	Viperidae	Hypnale	species	y	y					13	Kularatne	1999	7
Asia	Sri Lanka	Hypnale hypnale	Hypnale hypnale	n		Viperidae	Hypnale	species	y	y					14	Kularatne	2011b	15
Asia	Sri Lanka	Hypnale hypnale	Hypnale hypnale	n		Viperidae	Hypnale	species	y	y					18	Kularatne	2014	75
Asia	Sri Lanka	Hypnale hypnale	Hypnale hypnale	n		Viperidae	Hypnale	species	y	y					3	Maduwage	2013b	80
Asia	Sri Lanka	Hypnale hypnale	Hypnale hypnale	n		Viperidae	Hypnale	species	y	y					2	Maduwage	2013a	93
Asia	Sri Lanka	Hypnale nepa	Hypnale nepa	n		Viperidae	Hypnale	species	y	y					2	Maduwage	2013a	5
Asia	Sri Lanka	hump nosed viper	Hypnale spp.	y	common vs scientific name	Viperidae	Hypnale	genus	y	y					5	Wijewantha	2010	1543		not definitely brought to hospital; "Data collection was done consecutively during February 1990 and February 2008. Except Hypnale, identification of the biting snake was made by the corresponding author after visual examination of the dead or live snakes, which were brought to hospital...Identification of the biting snake as hump nosed viper was made by the corresponding author after visual exam…
Asia	Sri Lanka	hump-nosed viper	Hypnale spp.	y	common vs scientific name	Viperidae	Hypnale	genus	y	y					14	Kularatne	2011b	20
Asia	Sri Lanka	hump-nosed viper	Hypnale spp.	y	common vs scientific name	Viperidae	Hypnale	genus	y	y					11	Shahmy	2017	65
Asia	Sri Lanka	Hypnale hypnale & Hypnale nepa	Hypnale spp.	n		Viperidae	Hypnale	genus	y	y					9	Ariaratnam	2009	302
Asia	Sri Lanka	Hypnale zara	Hypnale zara	n		Viperidae	Hypnale	species	y	y					14	Kularatne	2011b	1
Asia	Sri Lanka	Hypnale zara	Hypnale zara	n		Viperidae	Hypnale	species	y	y					2	Maduwage	2013a	16
Asia	India	Macrovipera lebetina	Macrovipera lebetina	n		Viperidae	Macrovipera	species	y	y					7	Sharma	2008	1
Asia	Hong Kong	Naja naja	Naja atra	y	split	Elapidae	Naja	species	y	y					1	Cockram	1990	1		subspecies Naja naja atra elevated
Asia	Bangladesh	Naja kaouthia	Naja kaouthia	n		Elapidae	Naja	species	y	y					1	Harris	2010	1
Asia	Bangladesh	Naja kaouthia	Naja kaouthia	n		Elapidae	Naja	species	y	y					1	Harris	2012	1
Asia	Bangladesh	Naja kaouthia	Naja kaouthia	n		Elapidae	Naja	species	y	y					2	Faiz	2017	NR	NR
Asia	Thailand	Naja kaouthia	Naja kaouthia	n		Elapidae	Naja	species	y	y					3	Buranasin	1993	10	10
Asia	Thailand	Naja kaouthia	Naja kaouthia	n		Elapidae	Naja	species	y	y					5	Virivan	1986	13
Asia	Thailand	Naja kaouthia	Naja kaouthia	n		Elapidae	Naja	species	y	y					4	Viravan	1992	83
Asia	India	Naja naja	Naja naja	n		Elapidae	Naja	species	y	y					4	Bawaskar	2004	6	6
Asia	India	Naja naja	Naja naja	n		Elapidae	Naja	species	y	y					10	Joseph	2017	8
Asia	India	Naja naja	Naja naja	n		Elapidae	Naja	species	y	y					9	Kumar	2018	204
Asia	India	Naja naja	Naja naja	n		Elapidae	Naja	species	y	y					1	Bawaskar	2008	NR	NR
Asia	India	Naja naja	Naja naja	n		Elapidae	Naja	species	y	y					8	Kumar	2011	1
Asia	Nepal	Naja naja	Naja naja	n		Elapidae	Naja	species	y	y					1	Heap	1991	2		"Only 27 patients claimed to have seen the snake. Of these only 14 thought they could identify the snake, 6 claiming bites by krait, 7 by cobra and 1 by pit viper. In only 2 cases was the snake brought with the patient (one being a live snake) and both were identified as the cobra Naja naja."
Asia	Nepal	Naja naja	Naja naja	n		Elapidae	Naja	species	y	y					4	Hansdak	1998	2
Asia	Nepal	Naja naja	Naja naja	n		Elapidae	Naja	species	y	y					3	Sharma	2016	22
Asia	Pakistan	cobra	Naja naja	y	common vs scientific name	Elapidae	Naja	species	y	y						Asif	2015	2
Asia	Sri Lanka	cobra	Naja naja	y	common vs scientific name	Elapidae	Naja	species	y	y					11	Shahmy	2017	1
Asia	Sri Lanka	spectacled cobra	Naja naja	y	common vs scientific name	Elapidae	Naja	species	y	y					14	Kularatne	2011b	3
Asia	Sri Lanka	Naja naja	Naja naja	n		Elapidae	Naja	species	y	y					18	Kularatne	2014	7
Asia	Sri Lanka	Naja naja	Naja naja	n		Elapidae	Naja	species	y	y					7	Kularatne	2009	25
Asia	Sri Lanka	Naja naja	Naja naja	n		Elapidae	Naja	species	y	y					9	Ariaratnam	2009	45
Asia	Laos	Naja siamensis	Naja siamensis	n		Elapidae	Naja	species	y	y						Vongphoumy	2016	4
Asia	Thailand	Naja atra	Naja siamensis	y	split	Elapidae	Naja	species	y	y					4	Viravan	1992	114
Asia	India	cobra	Naja spp.	y	common vs scientific name	Elapidae	Naja	genus	y	y					5	Logaraj	2013	NR	NR
Asia	Myanmar	cobra	Naja spp.	y	common vs scientific name	Elapidae	Naja	genus	y	y					2	Aye	2018	7		genus contains 41 species (2 in Myanmar), might also include Ophiophagus (king cobras)
Asia	Nepal	Naja spp.	Naja spp.	n		Elapidae	Naja	genus	y	y					3	Sharma	2016	1
Asia	Thailand	Naja sumatrana	Naja sumatrana	n		Elapidae	Naja	species	y	y					4	Viravan	1992	1
Asia	Nepal	Ovophis monticola	Ovophis monticola	n		Viperidae	Ovophis	species	y	y					3	Sharma	2016	1
Asia	Thailand	Rhabdophis subminiatus	Rhabdophis subminiatus	n		Colubridae	Rhabdophis	species	y	y					4	Viravan	1992	5
Asia	Nepal	Trimeresurus albolabris	Trimeresurus albolabris	n		Viperidae	Trimeresurus	species	y	y					2	Pandey	2016	1		the taxonomic history of this group is extremely confusing; it's unclear whether T. albolabris is the right name for any snakes in Nepal (called Trimeresurus cf. albolabris by Sharma, T. albolabris for Schleich & Kästle)
Asia	Nepal	Trimeresurus albolabris	Trimeresurus albolabris	n		Viperidae	Trimeresurus	species	y	y					3	Sharma	2016	1		the taxonomic history of this group is extremely confusing; it's unclear whether T. albolabris is the right name for any snakes in Nepal (called Trimeresurus cf. albolabris by Sharma, T. albolabris for Schleich & Kästle)
Asia	Thailand	Trimeresurus albolabris	Trimeresurus albolabris	n		Viperidae	Trimeresurus	species	y	y					1	Hutton	1990	12
Asia	Thailand	Trimeresurus albolabris	Trimeresurus albolabris	n		Viperidae	Trimeresurus	species	y	y					2	Rojnuckarin	1999	23
Asia	Thailand	Trimeresurus albolabris	Trimeresurus albolabris	n		Viperidae	Trimeresurus	species	y	y					4	Viravan	1992	307
Asia	India	Trimeresurus gramineus	Trimeresurus gramineus	n		Viperidae	Trimeresurus	species	y	y					9	Kumar	2018	20
Asia	Thailand	Trimeresurus kanburiensis	Trimeresurus kanburiensis	n		Viperidae	Trimeresurus	species	y	y					4	Viravan	1992	1
Asia	Lao PDR	Trimeresurus macrops	Trimeresurus macrops	n		Viperidae	Trimeresurus	species	y	y					1	Blessmann	2010	1
Asia	Thailand	Trimeresurus macrops	Trimeresurus macrops	n		Viperidae	Trimeresurus	species	y	y					1	Hutton	1990	3
Asia	Thailand	Trimeresurus macrops	Trimeresurus macrops	n		Viperidae	Trimeresurus	species	y	y					2	Rojnuckarin	1999	7
Asia	Thailand	Trimeresurus macrops	Trimeresurus macrops	n		Viperidae	Trimeresurus	species	y	y					4	Viravan	1992	12
Asia	India	Trimeresurus malabaricus	Trimeresurus malabaricus	n		Viperidae	Trimeresurus	species	y	y					9	Kumar	2018	26
Asia	Thailand	Trimeresurus purpureomaculatus	Trimeresurus purpureomaculatus	n		Viperidae	Trimeresurus	species	y	y					4	Viravan	1992	3
Asia	Lao PDR	Trimeresurus spp.	Trimeresurus spp.	n		Viperidae	Trimeresurus	genus	y	y						Vongphoumy	2016	8
Asia	Myanmar	green pit viper	Trimeresurus spp.	y	common vs scientific name	Viperidae	Trimeresurus	genus	y	y					2	Aye	2018	4		genus contains 47 species (8 in Myanmar)
Asia	Nepal	Trimeresurus spp.	Trimeresurus spp.	n		Viperidae	Trimeresurus	genus	y	y					3	Sharma	2016	2
Asia	Thailand	Trimeresurus spp.	Trimeresurus spp.	n		Viperidae	Trimeresurus	genus	y	y					3	Buranasin	1993	22	22	33
Asia	Sri Lanka	green pit viper	Trimeresurus trigonocephalus	y	common vs scientific name	Viperidae	Trimeresurus	species	y	y					11	Shahmy	2017	2
Asia	Sri Lanka	Trimeresurus trigonocephalus	Trimeresurus trigonocephalus	n		Viperidae	Trimeresurus	species	y	y					18	Kularatne	2014	1
Asia	Sri Lanka	Trimeresurus trigonocephalus	Trimeresurus trigonocephalus	n		Viperidae	Trimeresurus	species	y	y					9	Ariaratnam	2009	6
Asia	Sri Lanka	Trimeresurus trigonocephalus	Trimeresurus trigonocephalus	n		Viperidae	Trimeresurus	species	y	y					15	Rathnayaka	2017a	10
Asia	Thailand	Tropidolaemus wagleri	Tropidolaemus wagleri	n		Viperidae	Tropidolaemus	species	y	y					4	Viravan	1992	2
Asia	Saudi Arabia	Walterinnesia aegyptia	Walterinnesia aegyptia	n		Elapidae	Walterinnesia	species	y	y					2	Mahaba	2000	1
Australo-papua	Australia	Boiga irregularis	Boiga irregularis	n		Colubridae	Boiga	species	n	maybe					6	Currie	2004	3		but some medically-significant bites to children known from Guam
Australo-papua	Australia	Rhinoplocephalus pallidiceps	Cryptophis pallidiceps	y	genus change	Elapidae	Cryptophis	species	n	maybe					6	Currie	2004	4		not listed as dangerous by Cogger/formerly known as Rhinoplocephalus; Fry et al. 2003 analyzed the venom & found the "overwhelmingly dominant component to be a 50 kDa component, and this venom was quite unusual for an elapid in being almost devoid of masses typical of 3FTx"; called C. nigrescens "small but lethal" & cited Sutherland & Tibbals 2001. Australian Animal Toxins (2nd ed), Oxford U Press
Australo-papua	Australia	Demansia olivacea	Demansia olivacea	n		Elapidae	Demansia	species	n	maybe					6	Currie	2004	5		"the remaining species are regarded as essentially harmless to humans" (Cogger 2014)/"Subject to confirmation by tests on fresh venom samples or by biting experiments with the living snake it is probable that the bite of [Demansia olivacea] is without danger to man...unless by chance a vessel were entered by the fangs" (Kellaway 1934)
Australo-papua	Australia	Demansia spp.	Demansia spp.	n		Elapidae	Demansia	genus	n	maybe					6	Currie	2004	17		Demansia atra or Demansia papuensis (genus contains 14 species in Australia); "venomous; large specimens can give a painful bite; indeed, large specimens of the larger species (papuensis, vestigiata) may deliver dangerous bites, but the remaining species are regarded as essentially harmless to humans" (Cogger 2014)
Australo-papua	Australia	Denisonia maculata	Denisonia maculata	n		Elapidae	Denisonia	species	n	maybe					3	Ibister	2016	1		although this species is not on the WHO MIVS list, "Denisonia maculata should be regarded as potentially dangerous…a bite can produce severe effects, although no deaths have been recorded" (Cogger 2014)
Australo-papua	Australia	Furina ornata	Furina ornata	n		Elapidae	Furina	species	n	maybe					6	Currie	2004	3		not regarded as dangerous to humans (F. barnardi)/"Venomous, but harmless to humans"(F. diadema)/no comment(F. dunmalli & F. ornata)/"Venomous, bite said to be very painful but not life-threatening"(F. tristis) (Cogger 2014)/"It is unlikely that even the largest specimen of [Furina annulata] would be dangerous to an adult man or larger animals. In any case...this species is very inoffensive and s…
Australo-papua	Australia	Hemiaspis signata	Hemiaspis signata	n		Elapidae	Hemiaspis	species	n	maybe					1	Ibister	2002	2		no comment (H. damelii)/"A bite from a large specimen may be very painful, but is not generally regarded as dangerous"(H. signata)
Australo-papua	Australia	Liasis childreni	Antaresia childreni	y	genus change	Pythonidae	Antaresia	species	n	n					6	Currie	2004	12
Australo-papua	Australia	Dendrelaphis punctulatus	Dendrelaphis punctulatus	n		Colubridae	Dendrelaphis	species	n	n					6	Currie	2004	2
Australo-papua	Australia	Fordonia leucobalia	Fordonia leucobalia	n		Homalopsidae	Fordonia	species	n	n					6	Currie	2004	1
Australo-papua	Australia	Liasis fuscus	Liasis fuscus	n		Pythonidae	Liasis	species	n	n					6	Currie	2004	9
Australo-papua	Australia	Liasis olivacea	Liasis olivaceus	y	spelling	Pythonidae	Liasis	species	n	n					6	Currie	2004	4
Australo-papua	Australia	Morelia spilota	Morelia spilota	n		Pythonidae	Morelia	species	n	n					6	Currie	2004	8
Australo-papua	Australia	Enhydris polylepis	Pseudoferania polylepis	y	genus change	Homalopsidae	Pseudoferania	species	n	n					6	Currie	2004	1		bites from Enhydris species may cause very minor local effects (Weinstein et al. 2011)
Australo-papua	Australia	Stegonotus cucullatus	Stegonotus australis	y	split	Colubridae	Stegonotus	species	n	n					6	Currie	2004	10		Stegonotus cucullatus restricted to New Guinea by Kaiser et al. (2018) but name much used in Australian literature
Australo-papua	Australia	Tropidonophis mairii	Tropidonophis mairii	n		Colubridae	Tropidonophis	species	n	n					6	Currie	2004	2
Australo-papua	Australia	Acanthophis sp.	Acanthophis sp.	n		Elapidae	Acanthophis	genus	y	y					6	Currie	2004	13	13	genus contains 7 species (all in Australia)
Australo-papua	Australia	Notechis spp.	Notechis scutatus	y	lump	Elapidae	Notechis	species	y	y					2	Ibister	2012	NR		Keogh et al. (2005) synonymized N. ater with N. scutatus; 56 with envenoming & 4 without; "The remaining 78 cases included 39 definite rough-scaled snakebites (Tropidechis carinatus; based on EIA)"
Australo-papua	Australia	Oxyuranus microlepidotus	Oxyuranus microlepidotus	n		Elapidae	Oxyuranus	species	y	y					6	Currie	2004	1
Australo-papua	Australia	Oxyuranus scutellatus	Oxyuranus scutellatus	n		Elapidae	Oxyuranus	species	y	y					6	Currie	2004	1
Australo-papua	Australia	Pseudechis australis	Pseudechis australis	n		Elapidae	Pseudechis	species	y	y					6	Currie	2004	8	8
Australo-papua	Australia	Pseudechis australis	Pseudechis australis	n		Elapidae	Pseudechis	species	y	y					4	Razavi	2014	22	22
Australo-papua	Australia	Pseudechis guttatus	Pseudechis guttatus	n		Elapidae	Pseudechis	species	y	y					6	Currie	2004	1
Australo-papua	Australia	Pseudonaja nuchalis	Pseudonaja nuchalis	n		Elapidae	Pseudonaja	species	y	y					7	Sprivulis	1995	1		initially misidentified as Pseudechis australis
Australo-papua	Australia	Pseudonaja nuchalis	Pseudonaja nuchalis	n		Elapidae	Pseudonaja	species	y	y					6	Currie	2004	12	12
Australo-papua	Australia	Pseudonaja spp.	Pseudonaja spp.	n		Elapidae	Pseudonaja	genus	y	y					5	Allen	2012	20	20	genus contains 9 species (all in Australia)
Central and South America	Brazil	Apostolepis assimilis	Apostolepis assimilis	n		Colubridae	Apostolepis	species	n	n					3	Nishioka	1995	1
Central and South America	Brazil	Boa constrictor	Boa constrictor	n		Boidae	Boa	species	n	n					3	Nishioka	1995	1
Central and South America	Brazil	Boa constrictor	Boa constrictor	n		Boidae	Boa	species	n	n					17	Silveira	1992	1
Central and South America	Brazil	Clelia clelia plumbea	Clelia plumbea	y	subspecies elevated	Colubridae	Clelia	species	n	n					6	Pinto	1991	1
Central and South America	Brazil	Sibynomorphus mikanii	Dipsas mikanii	y	genus change	Colubridae	Dipsas	species	n	n					3	Nishioka	1995	3		Arteaga et al. 2018 designated Sibynomorphus as a juniot subjective synonym of Dipsas
Central and South America	Brazil	Sibynomorphus mikanii	Dipsas mikanii	y	genus change	Colubridae	Dipsas	species	n	n					17	Silveira	1992	3		Arteaga et al. 2018 designated Sibynomorphus as a juniot subjective synonym of Dipsas
Central and South America	Brazil	Drymarchon corais	Drymarchon corais	n		Colubridae	Drymarchon	species	n	n					17	Silveira	1992	1
Central and South America	Brazil	Liophis poecylogirus	Erythrolamprus poecilogyrus	y	genus change	Colubridae	Erythrolamprus	species	n	n					3	Nishioka	1995	2		Grazziotin et al. 2012 found support for a monophyletic Erythrolamprus (priority of the name Erythrolamprus over Liophis)
Central and South America	Brazil	Liophis sp.	Erythrolamprus spp.	y	genus change	Colubridae	Erythrolamprus	genus	n	n					17	Silveira	1992	1		Grazziotin et al. 2012 found support for a monophyletic Erythrolamprus (priority of the name Erythrolamprus over Liophis)
Central and South America	Brazil	Eunectes murinus	Eunectes murinus	n		Boidae	Eunectes	species	n	n					3	Nishioka	1995	1
Central and South America	Brazil	Oxyrhopus trigeminus	Oxyrhopus trigeminus	n		Colubridae	Oxyrhopus	species	n	n					17	Silveira	1992	3
Central and South America	Brazil	Mastigodryas bifossatus	Palusophis bifossatus	y	genus change	Colubridae	Palusophis	species	n	n					3	Nishioka	1995	1		Montingelli et al. 2019 described a new genus for M. bifossatus
Central and South America	Brazil	Mastigodryas bifossatus	Palusophis bifossatus	y	genus change	Colubridae	Palusophis	species	n	n					17	Silveira	1992	2		Montingelli et al. 2019 described a new genus for M. bifossatus
Central and South America	Brazil	Philodryas matogrossensis	Philodryas mattogrossensis	y	spelling	Colubridae	Philodryas	species	n	n					3	Nishioka	1995	1		bites from some other members of the genus Philodryas are known to cause mild local effects, but no clinical descriptions of P. matogrossensis bites have been published'
Central and South America	Brazil	Philodryas olfersii	Philodryas olfersii	n		Colubridae	Philodryas	species	n	n					3	Nishioka	1995	1		genus contains 87 species (34 in Brazil)
Central and South America	Brazil	Philodryas olfersii	Philodryas olfersii	n		Colubridae	Philodryas	species	n	n					12	Correia	2010	1		The majority of P. olfersii bites cause mild to mildly-moderate local effects; Weinstein et al. 2011 review & offer critical comments on the oft-cited report of a fatality from this species, which does not contain sufficient detail to link the anecdote to an alleged P. olfersii bite
Central and South America	Brazil	Philodryas olfersii	Philodryas olfersii	n		Colubridae	Philodryas	species	n	n					17	Silveira	1992	2		The majority of P. olfersii bites cause mild to mildly-moderate local effects; Weinstein et al. 2011 review & offer critical comments on the oft-cited report of a fatality from this species, which does not contain sufficient detail to link the anecdote to an alleged P. olfersii bite
Central and South America	Brazil	Philodryas patagoniensis	Philodryas patagoniensis	n		Colubridae	Philodryas	species	n	n					15	Nishioka	1994	1		All known P. patagoniensis bites have no more than mild effects (poorly documented in literature; see Weinstein et al. 2011)
Central and South America	Brazil	Philodryas patagoniensis	Philodryas patagoniensis	n		Colubridae	Philodryas	species	n	n					17	Silveira	1992	1		All known P. patagoniensis bites have no more than mild effects (poorly documented in literature; see Weinstein et al. 2011)
Central and South America	Brazil	Philodryas patagoniensis	Philodryas patagoniensis	n		Colubridae	Philodryas	species	n	n					13	de Medeiros	2010	297		All known P. patagoniensis bites have no more than mild effects (poorly documented in literature; see Weinstein et al. 2011)
Central and South America	Brazil	Philodryas patagoniensis	Philodryas patagoniensis	n		Colubridae	Philodryas	species	n	n					3	Nishioka	1995	1		The majority of P. olfersii bites cause mild to mildly-moderate local effects; Weinstein et al. 2011 review & offer critical comments on the oft-cited report of a fatality from this species, which does not contain sufficient detail to link the anecdote to an alleged P. olfersii bite
Central and South America	Brazil	Simophis rhinostoma	Simophis rhinostoma	n		Colubridae	Simophis	species	n	n					3	Nishioka	1995	1
Central and South America	Brazil	Simophis rhinostoma	Simophis rhinostoma	n		Colubridae	Simophis	species	n	n					17	Silveira	1992	1
Central and South America	Brazil	Tomodon dorsatus	Tomodon dorsatus	n		Colubridae	Tomodon	species	n	n					14	de Medeiros	2019	86		limited documented effects are mild & transient (Weinstein et al. 2011)
Central and South America	Brazil	Waglerophis merremi	Xenodon merremii	y	genus change	Colubridae	Xenodon	species	n	n					3	Nishioka	1995	1		very few accounts of bites, a few suggest local symptoms (Weinstein et al. 2013); Zaher et al. 2009 and Grazziotin et al. 2012 found support for synonymizing Waglerophis and Lystrophis with Xenodon
Central and South America	Brazil	Waglerophis merremi	Xenodon merremii	y	genus change	Colubridae	Xenodon	species	n	n					17	Silveira	1992	2		very few accounts of bites, a few suggest local symptoms (Weinstein et al. 2013); Zaher et al. 2009 and Grazziotin et al. 2012 found support for synonymizing Waglerophis and Lystrophis with Xenodon
Central and South America	Brazil	Bothrops alternatus	Bothrops alternatus	n		Viperidae	Bothrops	species	y	y					3	Nishioka	1995	3
Central and South America	Brazil	Bothrops alternatus	Bothrops alternatus	n		Viperidae	Bothrops	species	y	y					9	Silveira	1995	3
Central and South America	Brazil	Bothrops atrox	Bothrops atrox	n		Viperidae	Bothrops	species	y	y					5	Pardal	2010	4	4
Central and South America	Brazil	Bothrops atrox	Bothrops atrox	n		Viperidae	Bothrops	species	y	y					8	Roriz	2018	18
Central and South America	Ecuador	Bothrops atrox	Bothrops atrox	n		Viperidae	Bothrops	species	y	y					1	Smalligan	2004	13
Central and South America	Peru	Bothrops atrox	Bothrops atrox	n		Viperidae	Bothrops	species	y	y					1	Villanueva Forero	2004	10	10
Central and South America	Ecuador	Bothrops bilineatus	Bothrops bilineatus	n		Viperidae	Bothrops	species	y	y					1	Smalligan	2004	12
Central and South America	Brazil	Bothropoides erythromelas	Bothrops erythromelas	y	genus change	Viperidae	Bothrops	species	y	y					4	Oliveira	2010	35
Central and South America	Brazil	Bothrops jararaca	Bothrops jararaca	n		Viperidae	Bothrops	species	y	y					7	Ribeiro	2001	779		"The diagnosis was made by doctors and was based on the epidemiology, clinical manifestations and, in all cases, by the identification of the snake by members of the Herpetology Laboratory of Instituto Butantan."
Central and South America	Brazil	Bothrops jararacussu	Bothrops jararacussu	n		Viperidae	Bothrops	species	y	y					16	Silveira	2016	1
Central and South America	Brazil	Bothrops moojeni	Bothrops moojeni	n		Viperidae	Bothrops	species	y	y					10	Brandao	1993	1
Central and South America	Brazil	Bothrops moojeni	Bothrops moojeni	n		Viperidae	Bothrops	species	y	y					9	Silveira	1995	19
Central and South America	Brazil	Bothrops moojeni	Bothrops moojeni	n		Viperidae	Bothrops	species	y	y					3	Nishioka	1995	21
Central and South America	Brazil	Bothrops moojeni	Bothrops moojeni	n		Viperidae	Bothrops	species	y	y					2	Nishioka	1992	29
Central and South America	Brazil	Bothrops neuwiedi	Bothrops neuwiedi	n		Viperidae	Bothrops	species	y	y					3	Nishioka	1995	5
Central and South America	Brazil	Bothrops neuwiedi	Bothrops neuwiedi	n		Viperidae	Bothrops	species	y	y					9	Silveira	1995	7
Central and South America	Brazil	Bothrops neuwiedi	Bothrops neuwiedi	n		Viperidae	Bothrops	species	y	y					2	Nishioka	1992	18
Central and South America	Brazil	Bothrops sp.	Bothrops sp.	n		Viperidae	Bothrops	genus	y	y					3	Nishioka	1995	4		genus contains 59 species (27 in Brazil)
Central and South America	Brazil	Bothrops sp.	Bothrops sp.	n		Viperidae	Bothrops	genus	y	y					2	Nishioka	1992	7		genus contains 59 species (27 in Brazil)
Central and South America	Brazil	Bothrops sp.	Bothrops sp.	n		Viperidae	Bothrops	genus	y	y					9	Silveira	1995	4
Central and South America	Ecuador	Bothrops taeniatus	Bothrops taeniatus	n		Viperidae	Bothrops	species	y	y					1	Smalligan	2004	2
Central and South America	Brazil	Crotalus durissus	Crotalus durissus	n		Viperidae	Crotalus	species	y	y					1	Bucaretchi	2013	1
Central and South America	Brazil	Crotalus durissus	Crotalus durissus	n		Viperidae	Crotalus	species	y	y					3	Nishioka	1995	6
Central and South America	Brazil	Crotalus durissus	Crotalus durissus	n		Viperidae	Crotalus	species	y	y					9	Silveira	1995	7
Central and South America	Brazil	Micrurus frontalis	Micrurus frontalis	n		Elapidae	Micrurus	species	y	y					11	Bucaretchi	2006	2
Central and South America	Brazil	Micrurus lemniscatus	Micrurus lemniscatus	n		Elapidae	Micrurus	species	y	y					8	Roriz	2018	1
Central and South America	Brazil	Micrurus lemniscatus	Micrurus lemniscatus	n		Elapidae	Micrurus	species	y	y					11	Bucaretchi	2006	1
Central and South America	Brazil	Micrurus spp.	Micrurus spp.	n		Elapidae	Micrurus	genus	y	y					11	Bucaretchi	2006	1		genus contains 87 species (34 in Brazil)
Central and South America	Brazil	Micrurus spp.	Micrurus spp.	n		Elapidae	Micrurus	genus	y	y					9	Silveira	1995	1
Europe	Croatia	Vipera ammodytes	Vipera ammodytes	n		Viperidae	Vipera	species	y	y					1	Luksic	2006	46
Europe	Greece	Vipera ammodytes	Vipera ammodytes	n		Viperidae	Vipera	species	y	y					1	Frangides	2006	37
Europe	Croatia	Vipera berus	Vipera berus	n		Viperidae	Vipera	species	y	y					1	Luksic	2006	3
North America	USA (Puerto Rico)	Alsophis portoricensis	Borikenophis portoricensis	y	genus change	Colubridae	Borikenophis	species	n	n					1	Garcia-Gubern	2010	5
North America	USA	Agkistrodon contortrix	Agkistrodon contortrix	n		Viperidae	Agkistrodon	species	y	y					1	Thorson	2003	26
North America	USA	Crotalus cerastes	Crotalus cerastes	n		Viperidae	Crotalus	species	y	y					2	Bosak	2014	1
